# Supplementary material
Source: PubMed Central journal article supplement (PMC7606217)
Supplement: NIHMS1587881-supplement-1.pdf [file NIHMS1587881-supplement-1.pdf]

**Supplement:**

**Associations of alpha and gamma-tocopherol during early life with lung function in childhood**

Authors: Rajesh Kumar MD MS<sup>1,2</sup>, Ryan Ferrie BS<sup>2</sup>, Lauren Balmert PhD<sup>2</sup>, Matthew Kienzl<sup>2</sup>, Sheryl L. Rifas-Shiman, MPH<sup>3</sup>, Diane R. Gold MD MPH<sup>4,5</sup>, Joanne E. Sordillo ScD MS<sup>3</sup>, Ken Kleinman ScD MPH<sup>6</sup>, Carlos A. Camargo Jr. MD MPH DrPH<sup>5,7</sup>, Augusto A. Litonjua MD MPH<sup>8</sup>, Emily Oken MD MPH<sup>3</sup>, Joan Cook-Mills PhD<sup>9</sup>

List of institutions

<sup>1</sup>Lurie Children's Hospital, Chicago, IL, USA

<sup>2</sup>Northwestern University, Chicago, IL, USA

<sup>3</sup> Division of Chronic Disease Research Across the Lifecourse, Department of Population Medicine, Harvard Medical School and Harvard Pilgrim Health Care Institute, Boston, MA USA

<sup>4</sup> Department of Environmental Health, Harvard T.H. Chan School of Public Health, Boston, MA, USA

<sup>5</sup> Channing Division of Network Medicine, Harvard Medical School, Brigham and Women's Hospital, Boston, MA, USA.

<sup>6</sup> Department of Biostatistics and Epidemiology, University of Massachusetts, Amherst, MA, USA

<sup>7</sup> Department of Emergency Medicine, Massachusetts General Hospital, Harvard Medical School, Boston, MA, USA

<sup>8</sup> Division of Pediatric Pulmonary Medicine, University of Rochester Medical Center, Rochester, NY

<sup>9</sup> Herman B Wells Center for Pediatric Research, Departments of Pediatrics and Microbiology and Immunology, Indiana University School of Medicine, Indianapolis, IN

Corresponding author:

Joan Cook-Mills, Department of Pediatrics, Herman B Wells Center for Pediatric Research, Indiana University School of Medicine, VanNuys Medical Science Building MS 2059, 635 Barnhill Drive, Indianapolis, IN 46202

Telephone: 317-274-8989

Email: [joancook@iu.edu](mailto:joancook@iu.edu)

Table S1: Distribution of asthma and wheezing<sup>†</sup> by tertile of each isoform

| <b>Isoform studied in child (3 Y) and pregnant mother(2<sup>nd</sup> trimester)</b> | Tertile of opposing tocopherol isoform | No asthma and no wheeze by age 7 (row %) | Asthma or wheeze by age 7 (row%) |
|-------------------------------------------------------------------------------------|----------------------------------------|------------------------------------------|----------------------------------|
| Alpha-T, 3 y                                                                        | 1                                      | 72 (55.8)                                | 57 (44.2)                        |
|                                                                                     | 2                                      | 93 (73.2)                                | 34 (26.8)                        |
|                                                                                     | 3                                      | 85 (61.2)                                | 54(38.9)                         |
| Gamma-T, 3y                                                                         | 1                                      | 93 (64.6)                                | 51(35.4)                         |
|                                                                                     | 2                                      | 73 (60.8)                                | 47 (39.2)                        |
|                                                                                     | 3                                      | 84 (64.1)                                | 47 (35.9)                        |
| Alpha-T, 2 <sup>nd</sup> trimester                                                  | 1                                      | 121 (66.1)                               | 62 (33.9)                        |
|                                                                                     | 2                                      | 130 (68.4)                               | 60 (31.6)                        |
|                                                                                     | 3                                      | 121 (69.5)                               | 53 (30.5)                        |
| Gamma-T, 2 <sup>nd</sup> trimester                                                  | 1                                      | 118 (66.7)                               | 59 (33.3)                        |
|                                                                                     | 2                                      | 131(69.7)                                | 57 (30.3)                        |
|                                                                                     | 3                                      | 123 (67.6)                               | 59 (32.4)                        |

<sup>†</sup> Parent report of a MD diagnosis of asthma at any point or a report of wheezing at any point on the questionnaires up to the mid childhood (7 year) visit.

Table S2: Distribution of use of controller medications<sup>†</sup> by tertile of tocopherol isoform within children with asthma\*

| <b>Isoform studied in child with asthma (3y) and pregnant mother (2<sup>nd</sup> trimester)</b> | Tertile of opposing tocopherol isoform | No controller med (row %) | Controller med (row%) |
|-------------------------------------------------------------------------------------------------|----------------------------------------|---------------------------|-----------------------|
| Alpha-T, 3 y                                                                                    | 1                                      | 33 (57.9)                 | 24 (42.1)             |
|                                                                                                 | 2                                      | 14 (41.2)                 | 20 (58.8)             |
|                                                                                                 | 3                                      | 25 (46.3)                 | 29(53.7)              |
| Gamma-T, 3y                                                                                     | 1                                      | 29 (56.7)                 | 22(43.1)              |
|                                                                                                 | 2                                      | 22 (46.8)                 | 25 (53.2)             |
|                                                                                                 | 3                                      | 21 (44.7)                 | 26 (55.3)             |
| Alpha-T, 2 <sup>nd</sup> trimester                                                              | 1                                      | 32 (51.6)                 | 30(48.4)              |
|                                                                                                 | 2                                      | 29 (48.3)                 | 31 (51.7)             |
|                                                                                                 | 3                                      | 26 (49.1)                 | 27 (50.9)             |
| Gamma-T, 2 <sup>nd</sup> trimester                                                              | 1                                      | 34 (57.6)                 | 25 (42.4)             |
|                                                                                                 | 2                                      | 24 (42.1)                 | 33 (57.9)             |
|                                                                                                 | 3                                      | 29 (49.2)                 | 30 (50.9)             |

<sup>†</sup> This denotes asthma controller medications in the past year at the mid-childhood visit including

Asthma at the mid childhood visit was limited to subjects who had a physician diagnosis of asthma or wheezing in the last year.

Table S3:

Comparison of 2<sup>nd</sup> trimester tocopherol isoforms ( $\mu\text{M}$ ) by any prenatal vitamin intake:

|                                    | No prenatal vitamins | Prenatal vitamins | P-value <sup>1</sup> |
|------------------------------------|----------------------|-------------------|----------------------|
|                                    | (median, IQR)        | (median, IQR)     |                      |
|                                    | (N=18)               | (N=477)           |                      |
| Alpha-T, 2 <sup>nd</sup> trimester | 63.2 (41.3, 100.1)   | 62.8 (49.4, 83.3) | 0.81                 |
| Gamma-T, 2 <sup>nd</sup> trimester | 5.3 (4.5, 10.8)      | 4.3 (3.0, 6.4)    | 0.01                 |

<sup>1</sup>P-value from Wilcoxon rank sum test
